# Supplementary material for: Cellulose-based hydrophobic carbon aerogels as versatile and superior adsorbents for sewage treatment
Source: Royal Society of Chemistry journal article supplement (doi:10.1039/c4ra08446b), 2014-01-01
Supplement: c4ra08446b3.pdf [file c4ra08446b3.pdf]

## Supporting information

### **Cellulose-based Hydrophobic Carbon Aerogels as Versatile and Superior Adsorbents for Sewage Treatment**

Haiyan Wang, Yutong Gong, Yong Wang\*

Carbon Nano Materials Group, Center for Chemistry of High-Performance and Novel  
Materials, Department of Chemistry, Zhejiang University, Hangzhou 310028, P. R.  
China

\*Corresponding author. E-mail: [chemwy@zju.edu.cn](mailto:chemwy@zju.edu.cn)

**This file includes:**

**Figure S1:** TEM images of the cellulose aerogel and carbon aerogel

**Figure S2:** N<sub>2</sub> adsorption/desorption isotherms of the cellulose aerogel and carbon aerogel (a), and Pore size distributions of the cellulose aerogel and carbon aerogel (b).

**Figure S3:** The volumes of meso and micropores in cellulose aerogel and carbon aerogel.

**Figure S4:** The morphologies of the carbon aerogel before and after burning

**Figure S5:** The SEM images of the carbon aerogel before and after burning

**Movie 1:** The video of the toluene adsorption with the carbon aerogel

**Movie 2:** The video of the Rose Bengal adsorption with the carbon aerogel

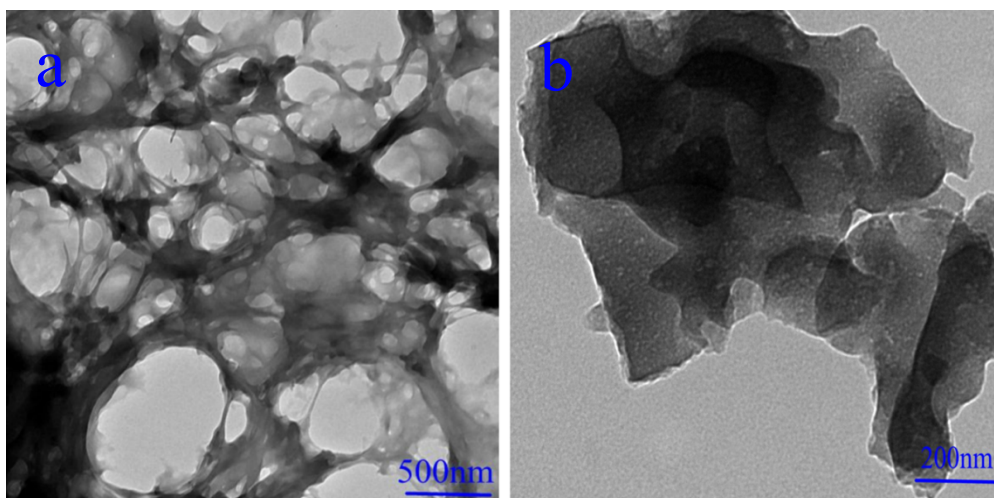

**Figure S1.** TEM images of the cellulose aerogel (a) after freeze-drying, and the carbon aerogel (b) after carbonization of the corresponding cellulose aerogel.

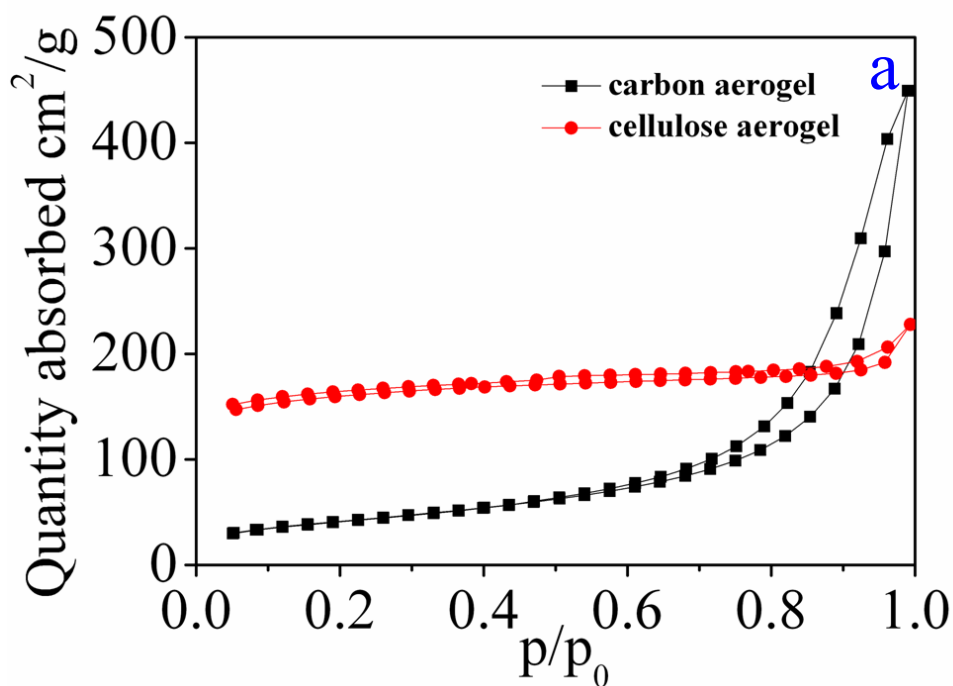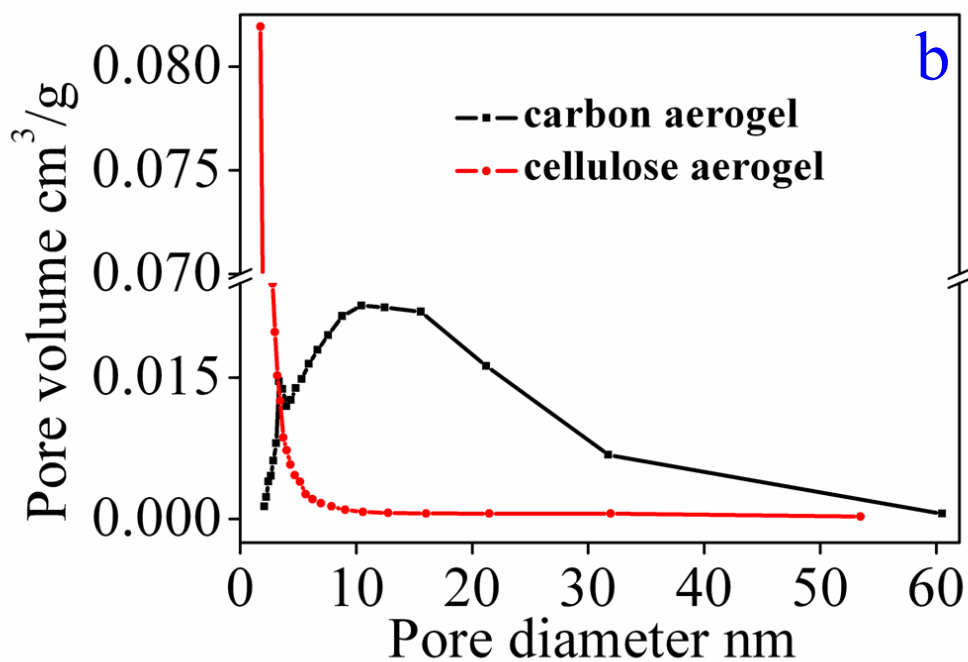

**Figure S2.** N<sub>2</sub> adsorption/desorption isotherms of the cellulose aerogel and carbon aerogel (a) and Pore size distributions of the cellulose aerogel and carbon aerogel (b).

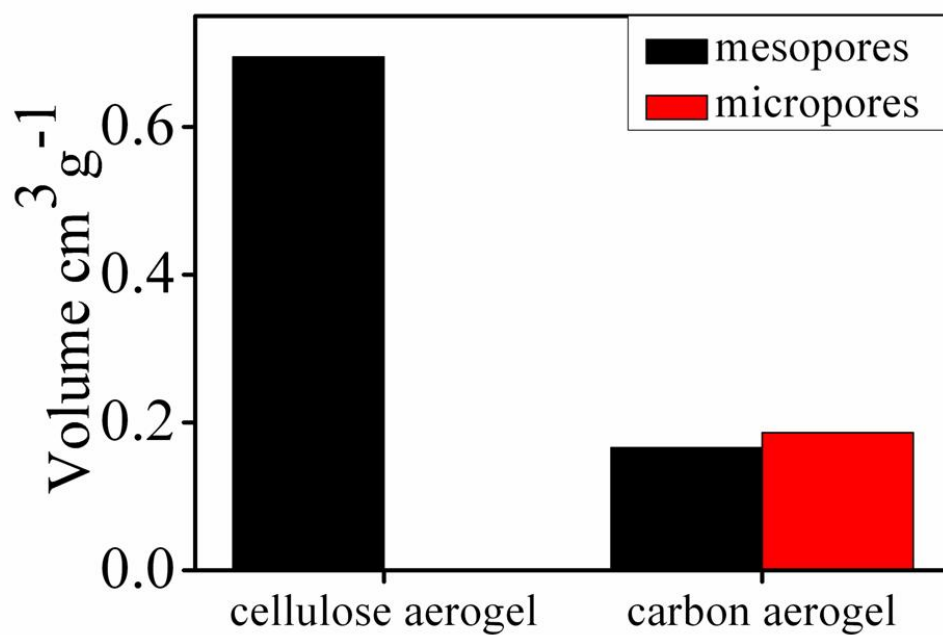

**Figure S3.** The volumes of meso and micropores in cellulose aerogel and carbon aerogel.

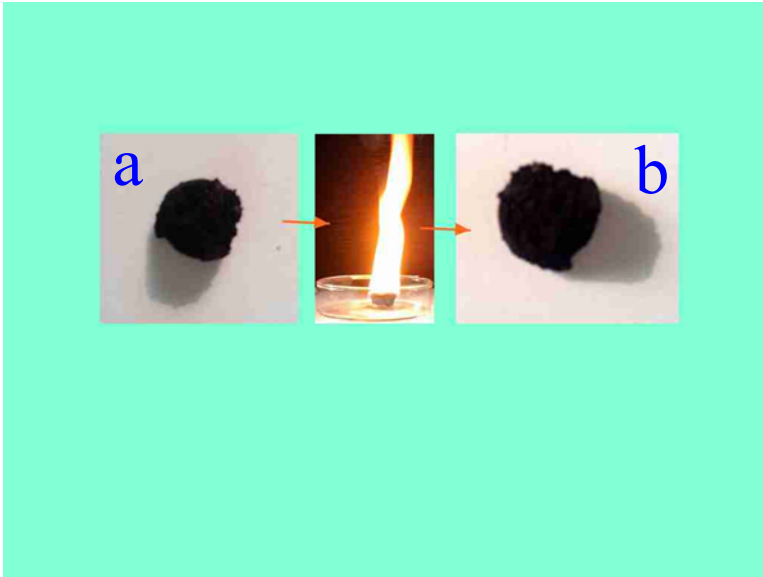

**Figure S4.** The morphologies of the carbon aerogel before (a) and after (b) burning.

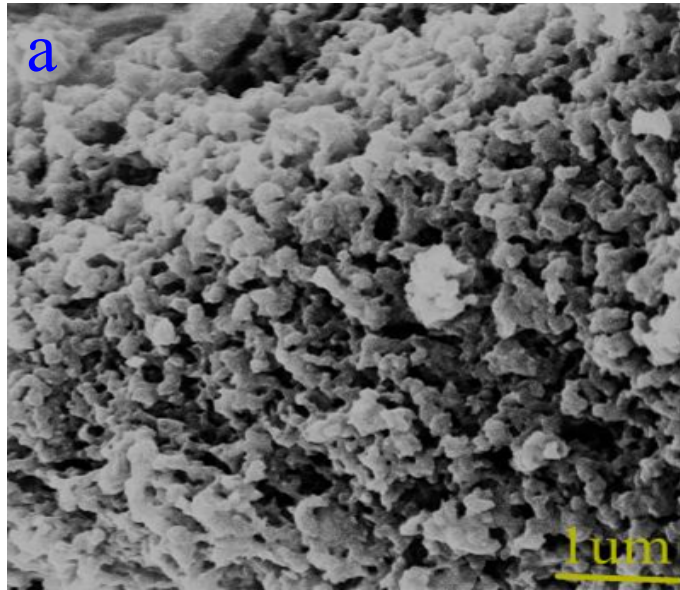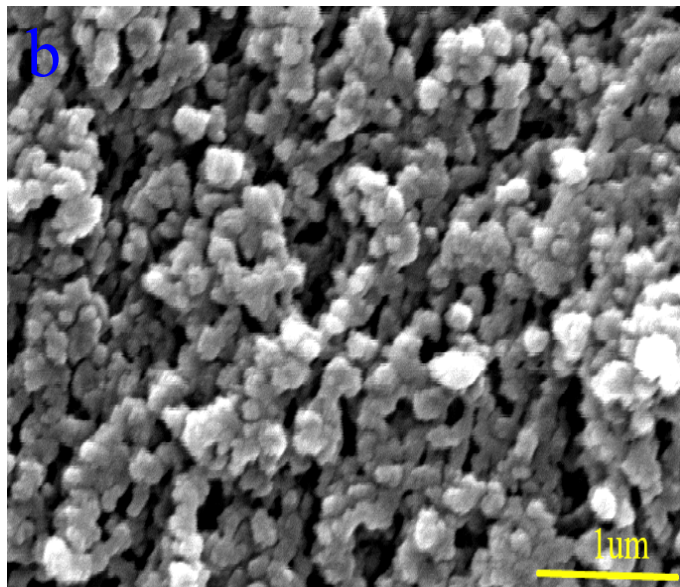

**Figure S5.** The SEM images of the carbon aerogel before (a) and after (b) burning.
